# Supplementary material for: Aligning the binder effect on sodium–air batteries
Source: Royal Society of Chemistry journal article supplement (doi:10.1039/c7ta09028e), 2017-12-19
Supplement: c7ta09028e1.pdf [file c7ta09028e1.pdf]

## Supporting Information

# Aligning the Binder Effect on Sodium-Air Battery

*Qian Sun, Hossein Yadegari, Wei Xiao, Yang Zhao, Keegan R. Adair, Ruying Li, Xueliang Sun\**

Department of Mechanical and Materials Engineering, University of Western Ontario, London,  
Ontario, N6A 5B9, Canada.

\*Email - xsun9@uwo.ca

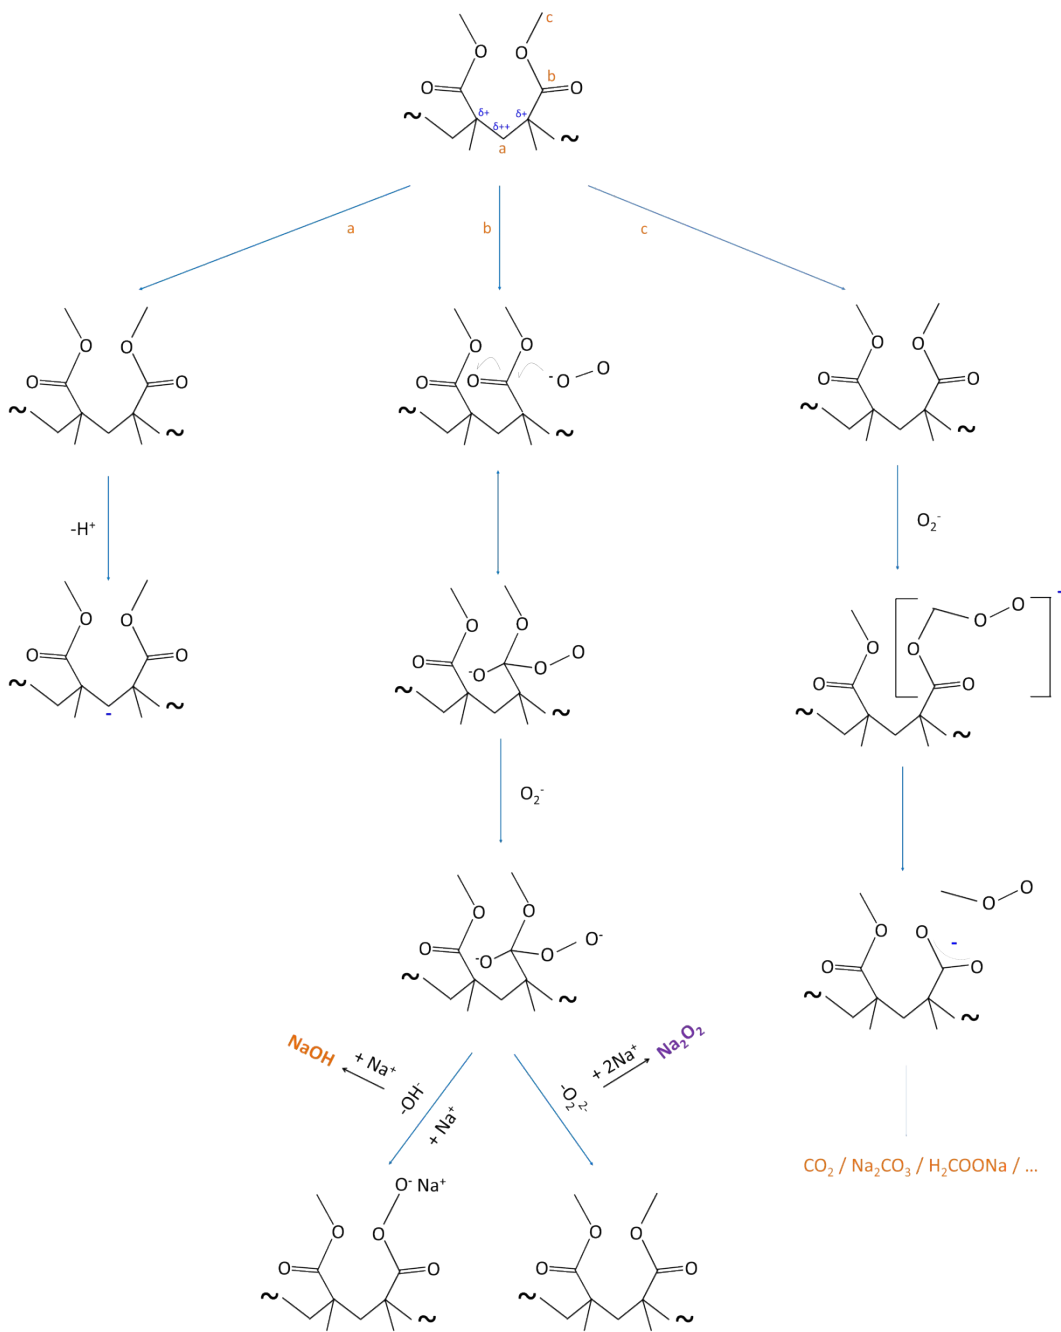

**Scheme S1.** Proposed decomposing mechanisms of PMMA in Na-air batteries.

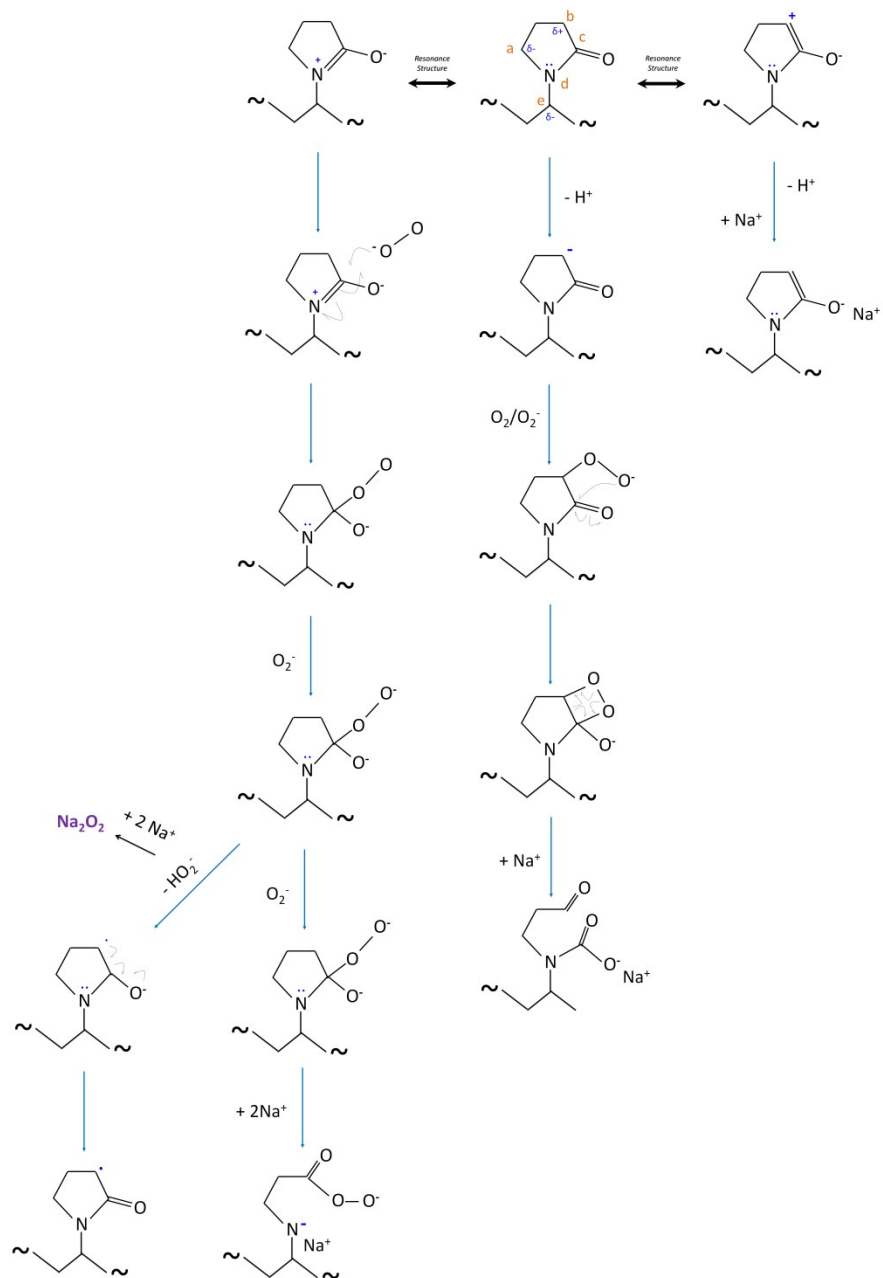

**Scheme S2.** Proposed decomposing mechanisms of PVP in Na-air batteries.

(a)

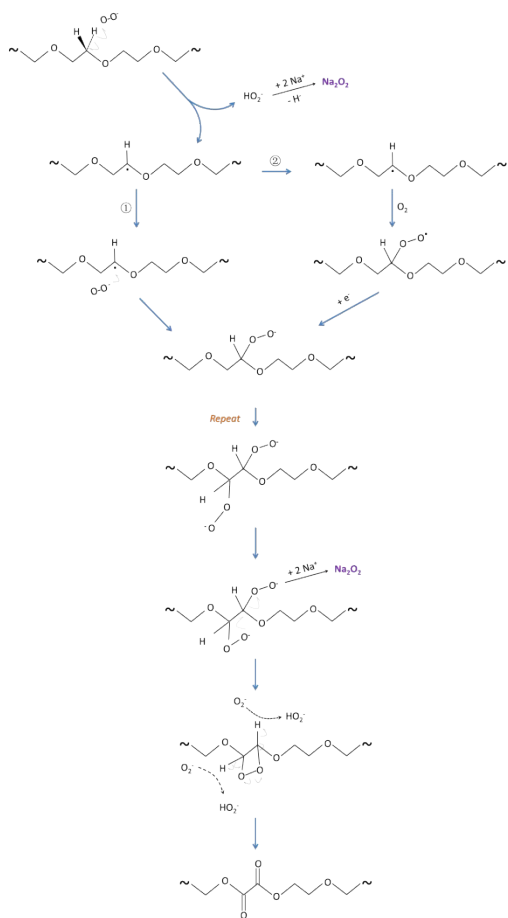

(b)

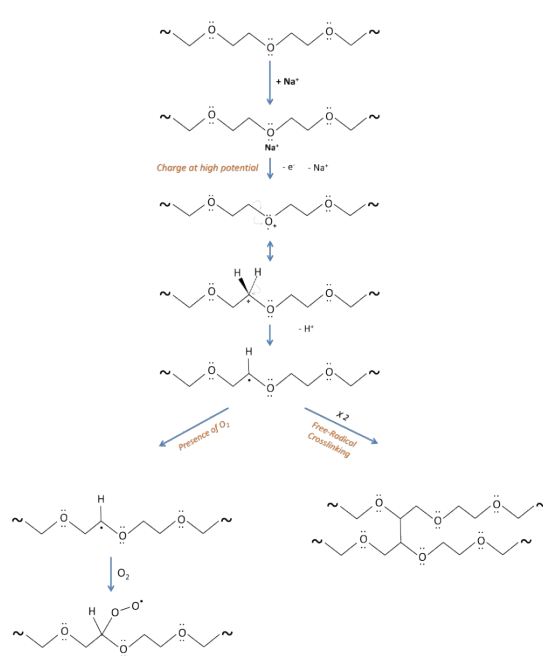

**Scheme S3.** Proposed decomposing mechanisms of PEO in Na-air batteries.
